# Supplementary material
Source: Research Square preprint supplement (doi:10.21203/rs.3.rs-9517990/v1)
Supplement: Supplementary file 1 [file 6f933e3765bda0a22a3e2621.docx]

**SUPPLEMENTARY INFORMATION**

**Model-Informed Precision Dosing Strategy for Sitagliptin and Duloxetine in Hepatic Cirrhosis: An Interventional Pilot Study**

**Aya Fouda1, Noha M. EL-Khodary1 , Ahmed A Amin 1** **, Mohammed Hussien Ahmed Hussien 2, Khaled Abdelkawy1, Eman El-Khateeb3,4, $**

**1** Clinical Pharmacy Department, Faculty of Pharmacy, Kafrelsheikh University, Kafrelsheikh, Egypt.

2 Hepatology, Gastroenterology, and Infectious Diseases Department, Faculty of Medicine, Kafrelshiekh University, Egypt.

3 Certara Predictive Technologies (CPT), Simcyp Division, Sheffield, UK

4 Clinical Pharmacy Department, Faculty of Pharmacy, Tanta University, Tanta, Egypt.

$ Corresponding author

Eman El-Khateeb

Certara Predictive Technologies, Level 2 – Acero, 1Concourse Way, Sheffield, S1 2BJ, UK. Email: [eman.el-khateeb@certara.com](mailto:eman.el-khateeb@certara.com)

**Table S1** Drug-specific parameters for sitagliptin

| Parameter | Value / model | Reference |
| --- | --- | --- |
| Molecular weight | 407.31 | Pubchem |
| Log p o/w | 1.95 | [ALOGPS](http://www.vcclab.org/lab/alogps/), Pubchem |
| Pka | 8.8 | Drug bank |
| Absorption | | |
| Model | First order absorption model | [1] |
| Fa | 1 | [2] |
| Ka (1/h) | 0.29 | [2] |
| FuGut | 1 | Simcyp default |
| QGut | 2.4045 | Predicted from Caco-2 data |
| (cm/s) | 0.30229 | Predicted |
| Permeability assay | Caco-2 | [3] |
| Apical pH: Basolateral pH | 6.5:7.4 |
| Distribution | | |
| Model | Full PBPK | |
| Vss (L/kg) | 2.27 | Predicted |
| Prediction method | Method 2 (Rodger’s et al., method) | [4] |
| B:P ratio | 1 | Predicted in Simcyp |
|  | 0.62 | [5] |
| Elimination (Tissue) | | |
| CLr(L/h) | 17.4 | [2] |
| Hep CLint (L/h) | 1.099 | [2] |
| CL int (Bile) (L/h) | 0.31 | [2] |

LogPo/W; octonal-water partition coefficient, pKa; acid dissociation constant, Fa; fraction absorbed, ka; absorption rate constant,;fraction of drug taken up by the gut,; gut blood flow, apparent permeability from Apical to Basolateral, PBPK; physiologically based pharmacokinetic, Vss; volume of distribution at steady state, B:P; blood to plasma, *;*fraction of unbound drug in plasma, Peff,man;human jejunum permeability, CLr; renal clearance, CLint; intrinsic clearance, Hep CLint;hepatic intrinsic clearance.

**Table S2** Drug-specific parameters for duloxetine

| Parameter | Value / model | Reference |
| --- | --- | --- |
| Molecular weight | 297.4 | Pubchem |
| Log p o/w | 4.258 | [6] |
| Pka | 10.02 | [6] |
| Absorption | | |
| Model | First order absorption model | [1] |
| Fa | 1 | [7] |
| Ka (1/hr) | 0.9 | [8] |
| FuGut | 0.012416 | Predicted |
| QGut | 17.85 | Predicted |
| (cm/s) | 8.7527 | Predicted |
| Permeability assay | Caco-2 | [3] |
| Apical pH: Basolateral pH | 6.5:7.4 |
| PSA (A2) | 21.26 | Drugbank |
| Distribution | | |
| Model | Minimal PBPK | |
| Vss (L/Kg) | 7.4 | [9] |
| Prediction method | Method 2 (Rodger’s et al., method) | [4] |
| B:P ratio | 0.84 | Predicted |
|  | 0.1 | [7] |
| Elimination (Enzyme Kinetics) | | |
| CYP1A2 (µL /min/pmol) | 5.19 | Optimised |
| CYP2D6 (µL /min/pmol) | 16.4 | Optimised |
| Interaction | | |
| Ezyme CYP2D6 | | |
| (µM) | 0.002 | Optimised |
| *Kapp* (µM) | 1E+06 | Optimised |

LogPo/W; octonal-water partition coefficient, pKa; acid dissociation constant, Fa; fraction absorbed, ka; absorption rate constant, ;fraction of drug taken up by the gut,; gut blood flow, apparent permeability from Apical to Basolateral, Vss; volume of distribution at steady state, B:P; blood to plasma, *;*fraction of unbound drug in plasma Peff,man;human jejunum permeability, CLint; intrinsic clearance, PBPK; physiologically based pharmacokinetics, CYP; cytochrome P450, ; rate constant of inactivation.

**Table S3** Predicted to observed pharmacokinetics (PK) parameters of sitagliptin

| **Drug** | **PK parameter** | **Predicted** | **Observed** | **Predicted** / Observed | **Observed data reference** |
| --- | --- | --- | --- | --- | --- |
| **Sitagliptin (oral)**  **100 mg (SD)** | AUC0-∞ (ŋg.h/ml) | 3036.45 | 3388 | 0.89 | [10] |
| Cmax (ŋg/ml) | 237.17 | 288 | 0.82 |
| **Sitagliptin (oral)**  **100 mg (SD)** | AUC0-∞ (ŋg.h/ml) | 2655.6# | 2904.1# | 0.91 | [11] |
| Cmax (ŋg/ml) | 0.21# | 0.29# | 0.73 |
| **Sitagliptin (oral)**  **100 mg (SD)** | AUC0-∞ (ŋg.h/ml) | 2803.35 | 3000 | 0.93 | [12] |
| Cmax (ŋg/ml) | 229.28 | 325.8 | 0.70 |
| **Sitagliptin (oral)**  **100 mg (SD)** | AUC 0-t (ŋg.h/ml) | 3081.68 | 2936.01 | 1.04 | [13] |
| Cmax (ŋg/ml) | 235.03 | 338.94 | 0.69 |
| **Sitagliptin (oral)**  **100 mg (SD)** | AUC0-∞ (ŋg.h/ml) | 9.487 | 7.018 | 1.35 | [14] |
| Cmax (ŋg/ml) | 690.08 | 814.3 | 0.84 |
| **Sitagliptin (oral)**  **100 mg (SD)** | AUC0-∞ (ŋg.h/ml) | 2664.75* | 3218* | 0.83 | [15] |
| Cmax (ŋg/ml) | 203.45* | 399* | 0.51 |
| **Sitagliptin (oral)**  **200 mg (MD) (day1)** | AUC0-∞ (ŋg.h/ml) | 7087.2 | 5987.45 | 1.18 | [16] |
| Cmax (ŋg/ml) | 0.492 | 0.929 | 0.53 |
| **Sitagliptin (oral)**  **200 mg (MD) (day 28)** | AUC0-∞ (ŋg.h/ml) | 6802.1 | 8309.1 | 0.82 |
| Cmax (ŋg/ml) | 0.754 | 1.189 | 0.63 |
| **Sitagliptin (oral)**  **5 mg (SD)** | AUC0-∞ (ŋg.h/ml) | 158.85* | 203.66* | 0.78 | [17] |
| Cmax (ŋg/ml) | 0.012* | 0.011* | 1.1 |
| **Sitagliptin (oral)**  **12.5 mg (SD)** | AUC0-∞ (ŋg.h/ml) | 403.24* | 391.02* | 1.03 |
| Cmax (ŋg/ml) | 0.031* | 0.024* | 1.3 |
| **Sitagliptin (oral)**  **25 mg (fasted)(SD)** | AUC0-∞ (ŋg.h/ml) | 806.47* | 830.91* | 0.97 |
| Cmax (ŋg/ml) | 0.061* | 0.061* | 1 |
| **Sitagliptin (oral)**  **25 mg (fed)(SD)** | AUC0-∞ (ŋg.h/ml) | 859.42* | 908.30* | 0.95 |
| Cmax (ŋg/ml) | 0.064* | 0.069* | 0.93 |
| **Sitagliptin (oral)**  **50mg (SD)** | AUC0-∞ (ŋg.h/ml) | 1617.02* | 1531.49* | 1.05 |
| Cmax (ŋg/ml) | 0.122* | 0.126* | 0.97 |
| **Sitagliptin (oral)**  **100 mg(SD)** | AUC0-∞ (ŋg.h/ml) | 3498.8* | 3523.2* | 0.99 |
| Cmax (ŋg/ml) | 0.255* | 0.391* | 0.65 |
| **Sitagliptin (oral)**  **200 mg (SD)** | AUC0-∞ (ŋg.h/ml) | 6997.59* | 6720.62* | 1.04 |
| Cmax (ŋg/ml) | 0.509* | 0.802* | 0.63 |
| **Sitagliptin(oral)**  **400mg (SD)** | AUC0-∞ (ŋg.h/ml) | 13604.2* | 13033.9* | 1.04 |
| Cmax (ŋg/ml) | 1.01* | 1.61 | 0.63 |
| **Sitagliptin (oral) 25 mg (MD) (day1)** | AUC 0-t,(ŋg.h/ml) | 773.89 | 692.43 | 1.11 | [18] |
| Cmax (ŋg/ml) | 0.055 | 0.056 | 0.98 |
| **Sitagliptin (oral) 50 mg (MD) (day1)** | AUC 0-t, (ŋg.h/ml) | 1303.4 | 1181.2 | 1.10 |
| Cmax (ŋg/ml) | 0.110 | 0.113 | 0.98 |
| **Sitagliptin (oral) 100 mg (MD)(day1)** | AUC 0-t, (ŋg.h/ml) | 2606.78 | 3054.83 | 0.85 |
| Cmax (ŋg/ml) | 540.24 | 882 | 0.61 |
| **Sitagliptin (oral) 200 mg (MD) (day1)** | AUC 0-t, (ŋg.h/ml) | 5180.98 | 6272.57 | 0.83 |
| Cmax (ŋg/ml) | 0.440 | 0.920 | 0.5 |
| **Sitagliptin (oral) 300 mg (MD)(day1)** | AUC 0-t,(ŋg.h/ml) | 5942.65 | 8024 | 0.7 |
| Cmax (ŋg/ml) | 1.76 | 1.32 | 1.3 |
| **Sitagliptin (oral) 400 mg (MD)(day1)** | AUC 0-t, (ŋg.h/ml) | 10357.9 | 11282.5 | 0.92 |
| Cmax (ŋg/ml) | 0.88 | 1.48 | 0.6 |
| **Sitagliptin (oral) 25 mg (MD)(day10)** | AUC 0-t, (ŋg.h/ml) | 692.43 | 855.35 | 0.81 |
| Cmax (ŋg/ml) | 146.76 | 172 | 0.85 |
| **Sitagliptin (oral) 50 mg (MD)(day1)** | AUC 0-t, (ŋg.h/ml) | 1425.59 | 1507.05 | 0.95 |
| Cmax (ŋg/ml) | 0.12 | 0.15 | 0.80 |
| **Sitagliptin (oral) 100 mg (MD)(day1)** | AUC 0-t, (ŋg.h/ml) | 2810.4 | 3462.14 | 0.81 |
| Cmax (ŋg/ml) | 0.24 | 0.38 | 0.62 |
| **Sitagliptin (oral) 200 mg (MD)(day1)** | AUC 0-t, (ŋg.h/ml) | 5620.88 | 6598.4 | 0.85 |
| Cmax (ŋg/ml) | 0.48 | 0.93 | 0.51 |
| **Sitagliptin (oral) 300 mg (MD)(day1)** | AUC 0-t, (ŋg.h/ml) | 14801.65 | 11241.76 | 1.3 |
| Cmax (ŋg/ml) | 1.68 | 1.85 | 0.9 |
| **Sitagliptin (oral) 400 mg (MD)(day1)** | AUC 0-t,(ŋg.h/ml) | 11241.76 | 12056.38 | 0.93 |
| Cmax (ŋg/ml) | 0.96 | 1.54 | 0.62 |
| **Sitagliptin (oral)**  **100 mg (SD)** | AUC 0-t,(ŋg.h/ml) | 3060.49 | 2600 | 1.2 | **[19]** |
| Cmax (ŋg/ml) | 232.64 | 341 | 0.7 |
| **Sitagliptin (oral)**  **100 mg (SD)** | AUC 0-t,(ŋg.h/ml) | 3719.39 | 3310 | 1.12 | **[20]** |
| Cmax (ŋg/ml) | 262.56 | 403 | 0.65 |

*Geometric least-squares mean ± SD, #geometric least square means, SD; single dose, MD; multiple dose

**Table S4** Predicted to observed pharmacokinetics (PK) parameters of duloxetine

| **Drug** | **Pk parameter** | **Predicted** | **Observed** | **Predicted / observed** | **Observed data reference** |
| --- | --- | --- | --- | --- | --- |
| **Duloxetine (oral)**  **30 mg (MD) Female** | AUC0-∞ (ŋg.h/ml) | 489.14 | 962.01 | 0.50 | [21] |
| Cmax (ŋg/ml) | 32.62 | 47.33 | 0.689 |
| **Duloxetine (oral)**  **30mg (SD)** | AUC0-∞ (ŋg.h/ml) | 505.91 | 359.68 | 1.406 |
| Cmax (ŋg/ml) | 30.75 | 22.46 | 1.369 |
| **Duloxetine (oral)**  **60mg (SD)** | AUC0-∞ (ŋg.h/ml) | 991.19 | 733.82 | 1.35 |
| Cmax (ŋg/ml) | 65.24 | 44.40 | 1.469 |
| **Duloxetine (oral)**  **90mg (SD)** | AUC0-∞ (ŋg.h/ml) | 1011.81 | 1280.51 | 0.79 |
| Cmax (ŋg/ml) | 61.50 | 60.78 | 1.01 |
| **Duloxetine (oral)**  **30 mg (SD) male** | AUC0-∞ (ŋg.h/ml) | 548.89 | 387.33 | 1.41 |
| Cmax (ŋg/ml) | 29.77 | 26.80 | 1.11 |
| **Duloxetine (oral)**  **30 mg (SD) female** | AUC0-∞ (ŋg.h/ml) | 495.60 | 269.96 | 1.84 |
| Cmax (ŋg/ml) | 32.62 | 18.11 | 1.80 |
| **Duloxetine (oral)**  **60 mg (SD) male** | AUC0-∞ (ŋg.h/ml) | 1097.78 | 755.22 | 1.45 |
| Cmax (ŋg/ml) | 59.54 | 46.95 | 1.26 |
| **Duloxetine (oral)**  **60 mg (SD) female** | AUC0-∞ (ŋg.h/ml) | 991.19 | 636.80 | 1.6 |
| Cmax (ŋg/ml) | 65.24 | 41.85 | 1.6 |
| **Duloxetine (oral)**  **90 mg (SD) male** | AUC0-∞ (ŋg.h/ml) | 1097.78 | 1415.40 | 0.78 |
| Cmax (ŋg/ml) | 59.54 | 68.39 | 0.87 |
| **Duloxetine (oral)**  **90 mg (SD) female** | AUC0-∞ (ŋg.h/ml) | 991.19 | 1020.91 | 0.97 |
| Cmax (ŋg/ml) | 65.24 | 53.16 | 1.22 |
| **Duloxetine (oral)**  **30 mg male (MD)** | AUC0-∞ (ŋg.h/ml) | 530.73 | 899.12 | 0.59 |
| Cmax (ŋg/ml) | 29.77 | 45.41 | 0.66 |
| **Duloxetine (oral)**  **30 mg female (MD)** | AUC0-∞ (ŋg.h/ml) | 489.14 | 953.89 | 0.51 |
| Cmax (ŋg/ml) | 32.62 | 49.64 | 0.66 |
| **Moderate cirrhosis** | AUC0-t(ŋg.h/ml) | 472.50 | 775 | 0.61 | [22] |
| Cmax (ŋg/ml) | 24.35 | 14.6 | 1.67 |
| **Duloxetine (oral)**  **Healthy** | AUC 0-t(ŋg.h/ml) | 249.01 | 268 | 0.93 |
| Cmax (ŋg/ml) | 16.76 | 13.8 | 1.21 |
| **Duloxetine (oral)**  **chinese (SD)** | AUC(ŋg.h/ml) | 1009.09 | 591 | 1.71 | [23] |
| Cmax (ŋg/ml) | 61.95 | 36.3 | 1.70 |
| **Duloxetine (oral)**  **chinese (MD)** | AUC(ŋg.h/ml) | 1009.09 | 691 | 1.46 |
| Cmax (ŋg/ml) | 61.95 | 53.2 | 1.16 |
| **Duloxetine (oral)**  **Caucasian (SD)** | Cmax (ŋg/ml) | 44.09 | 39.8 | 1.1 |
| **Duloxetine (oral)**  **Japanese (SD)** | Cmax (ŋg/ml) | 79.56 | 46 | 1.7 |
| **Duloxetine (oral)**  **Caucasian**  **20 mg (SD)** | AUC (ŋg.h/ml) | 235.71 | 169 | 1.4 | [24] |
| Cmax (ŋg/ml) | 15.33 | 12.5 | 1.2 |
| **Duloxetine (oral)**  **Caucasian 40 mg (SD)** | AUC (ŋg.h/ml) | 471.43 | 370 | 1.3 |
| Cmax (ŋg/ml) | 30.65 | 25.5 | 1.2 |
| **Duloxetine (oral)**  **Caucasian 60 mg (SD)** | AUC (ŋg.h/ml) | 707.14 | 584 | 1.2 |
| Cmax (ŋg/ml) | 45.98 | 38.7 | 1.18 |
| **Duloxetine (oral)**  **Caucasian 20mg (MD)** | AUCtss,norm(ŋg.h/ml) (mg.kg-1) | 383.20 | 604 | 0.63 |
| Cmaxss,norm(ŋg/ml) (mg.kg-1) | 83.53 | 72.2 | 1.2 |
| **Duloxetine (oral)**  **Caucasian 40 m(MD)** | AUCtss,norm(ŋg.h/ml) (mg.kg-1) | 769.19 | 693 | 1.1 |
| Cmaxss,norm(ŋg/ml) (mg.kg-1) | 96.78 | 80.7 | 1.2 |
| **Duloxetine (oral)**  **Japanese 20 mg (SD)** | AUC (ŋg.h/ml) | 334.70 | 207 | 1.6 |
| Cmax (ŋg/ml) | 21.60 | 14.7 | 1.5 |
| **Duloxetine (oral)**  **Japanese 40 mg(SD)** | AUC (ŋg.h/ml) | 669.40 | 452 | 1.48 |
| Cmax (ŋg/ml) | 43.19 | 30 | 1.43 |
| **Duloxetine (oral)**  **Japanese 60 mg (SD)** | AUC (ŋg.h/ml) | 1004.10 | 714 | 1.4 |
| Cmax (ŋg/ml) | 64.79 | 45.6 | 1.42 |
| **Duloxetine (oral)**  **Japanese 20 mg (MD)** | AUCtss,norm(ŋg.h/ml) (mg.kg-1) | 610.96 | 668 | 0.91 |
| Cmaxss,norm(ŋg/ml) (mg.kg-1) | 105.28 | 81.4 | 1.3 |
| **Duloxetine (oral)**  **Japanese 40 mg (MD)** | AUCtss,norm(ŋg.h/ml) (mg.kg-1) | 1720.9 | 966 | 1.8 |
| Cmaxss,norm(ŋg/ml) (mg.kg-1) | 207.28 | 108 | 1.92 |
| **Healthy Chinese**  **22.4 mg (SD)** | AUC0-∞ (ŋg.h/ml) | 756.85 | 387.9 | 1.95 | [25] |
| Cmax (ŋg/ml) | 22.51 | 22.7 | 0.99 |
| **Duloxetine (oral)**  **44.8 mg (SD)** | AUC0-∞ (ŋg.h/ml) | 370.54 | 637.5 | 0.6 |
| Cmax (ŋg/ml) | 63.19 | 42.3 | 1.5 |
| **Duloxetine (oral)**  **67.2 mg (SD)** | AUC0-∞ (ŋg.h/ml) | 1111.63 | 1141.9 | 0.97 |
| Cmax (ŋg/ml) | 67.54 | 69.9 | 0.97 |
| **Duloxetine (oral)**  **40 mg (SD)** | AUC0-∞ (ŋg.h/ml) | 762.50 | 699.3 | 1.09 | [26] |
| Cmax (ŋg/ml) | 51.57 | 49.8 | 1.04 |
| **Duloxetine (oral)**  **40 mg (MD)** | AUC12,ss(ŋg.h/ml) | 512.66 | 463 | 1.1 | [27] |
| Cmax,ss (ŋg/ml) | 57.12 | 53.5 | 1.1 |
| **Duloxetine (oral)**  **15 mg (SD)** | AUC0-∞ (ŋg.h/ml) | 254.93 | 175.39 | 1.5 | [8] |
| Cmax (ŋg/ml) | 15.24 | 10.44 | 1.5 |
| **Duloxetine (oral)**  **30 mg (SD)** | AUC0-∞ (ŋg.h/ml) | 530.17 | 489.35 | 1.1 |
| Cmax (ŋg/ml) | 30.84 | 31.82 | 0.97 |
| **Duloxetine (oral)**  **60 mg (SD)** | AUC0-∞ (ŋg.h/ml) | 961.31 | 1073.99 | 0.9 |
| Cmax (ŋg/ml) | 60.17 | 55.88 | 1.1 |
| **Duloxetine (oral)**  **30 mg (MD)** | AUC0-∞ (ŋg.h/ml) | 529.98 | 840.26 | 0.63 |
| Cmax (ŋg/ml) | 30.84 | 43.09 | 0.72 |

SD; single dose, MD; multiple dose

**Table S5** pathophysiological changes between healthy populations and cirrhotic patients with different classes.

| Parameter | Gender | Population | | | | Reference |
| --- | --- | --- | --- | --- | --- | --- |
| Healthy | CP-A | CP-B | CP-C | All population-specific parameter values were kept the same  As in Simcyp® simulator (version 22, Certara, Sheffield, UK). |
| Hepatic arterial blood flow rate (%) | Male / female | 6.5 | 8.41 | 8.19 | 9.37 |
| Portal blood flow rate (%) | Male | 19 | 19.69 | 15.85 | 12.71 |
| Female | 21.5 | 22.28 | 17.93 | 14.38 |
| Villous blood flow rate (%) | Male / female | 6 | 8.85 | 9.16 | 11.15 |
| Cardiac output scalar | Male/ female | 1 | 1.15 | 1.31 | 1.4 |
| Liver volume (L) | Male / female | 1.651 | 1.4195 | 1.172 | 0.974 |
| Albumin (g/L) | Male | 50.34 | 42.61 | 35.97 | 28.52 |
| Female | 49.38 | 41.8 | 35.28 | 27.97 |
| Hematocrit (%) | Male | 43 | 41.1 | 34.75 | 33.92 |
| Female | 38 | 36.32 | 30.71 | 29.97 |
| Mean fasting gastric residence time (h) | Male | 0.4 | 0.4 | 0.56 | 0.6 |
| Cytochrome | | | | | |
| CYP2D6 (pmol/mg/protein) | | 9.4 | 8.43 | 5.88 | 1.59 |
| CYP3A4 (pmol/mg/protein) | | 137 | 107 | 70.2 | 42.8 |
| CYP2C8 (pmol/mg/protein) | | 24 | 24 | 24 | 24 |
| CYP1A2 (pmol/mg/protein) | | 52 | 37.6 | 17.2 | 8.81 |

CYP; cytochrome, CP-A; Child-Pugh A, CP-B; Child-Pugh B, CP-C; Child-Pugh C.


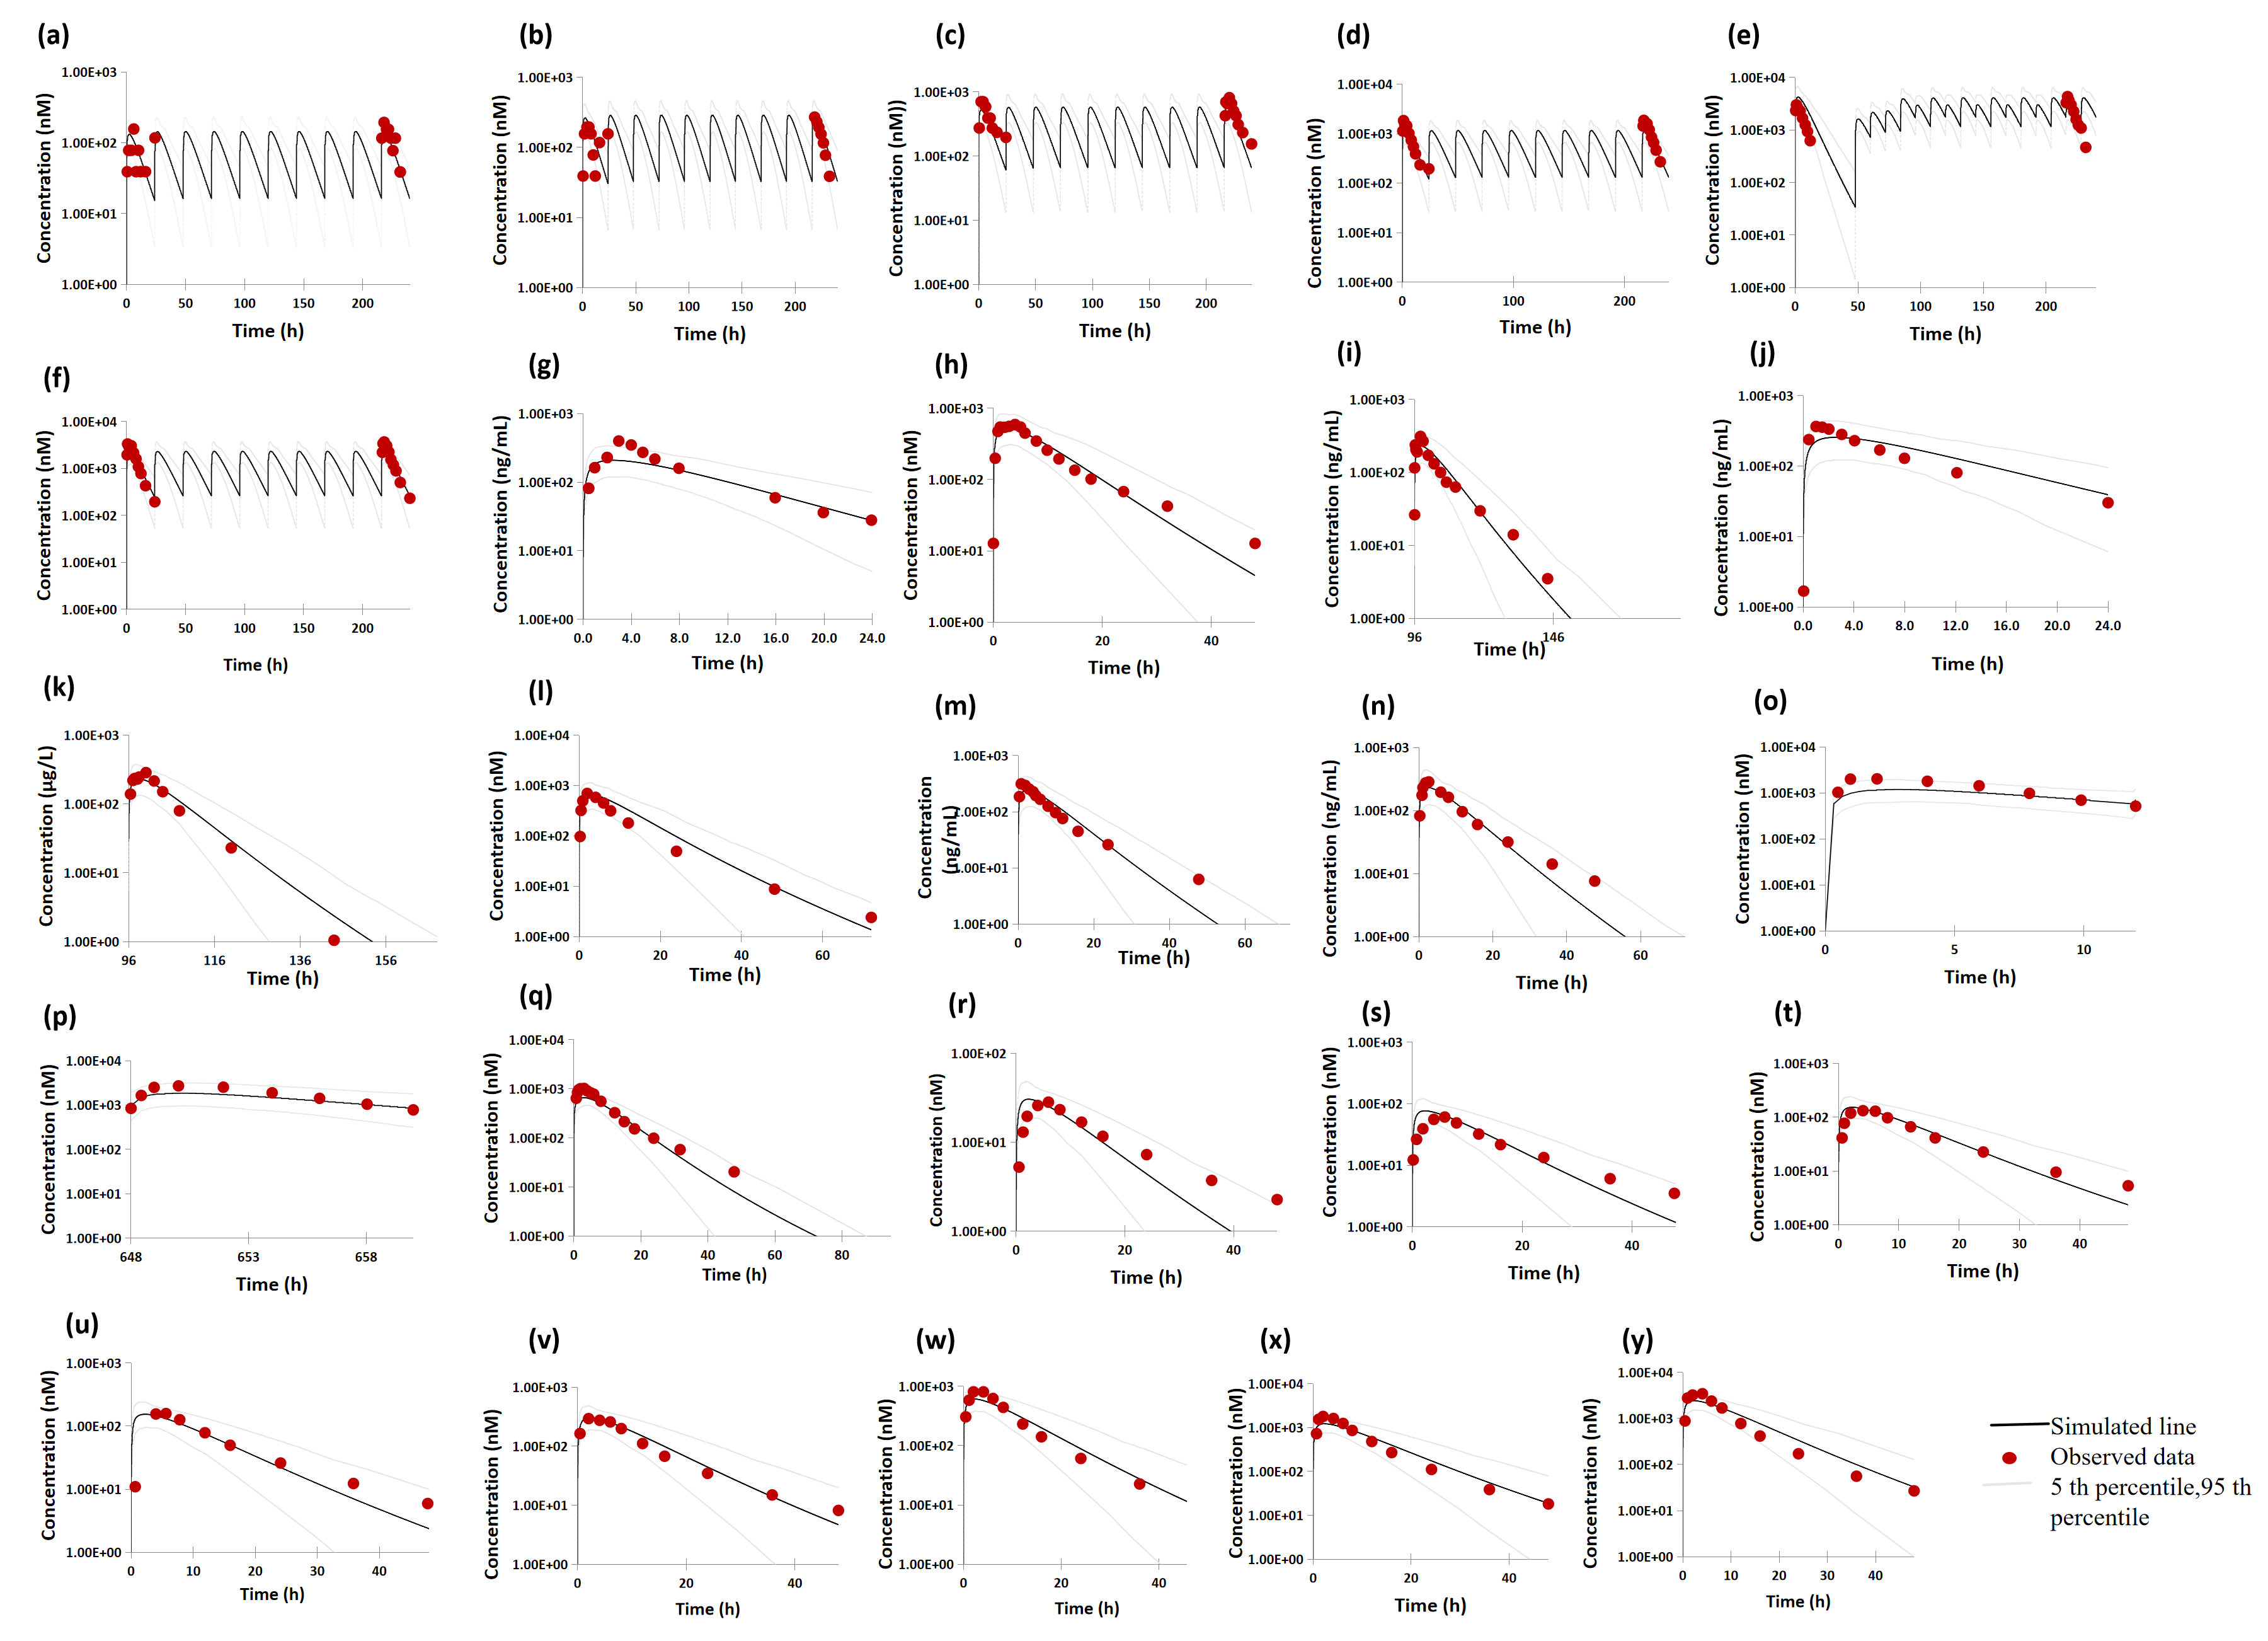


**Fig. S1** Mean plasma concentration-time profiles of sitagliptin after (a) a single-dose administration (day 1) and at steady state (10 days) of 25 mg (10 trials of 8 subjects, 18-45 years, male volunteers)[18]. (b) a single-dose administration (day 1) and at steady state (10 days) of 50 mg (10 trials of 8 subjects, male volunteers, 18-45 years)[18]. (c) a single-dose administration (day 1) and at steady state (10 days) of 100 mg (10 trials of 8 subjects, 18-45 years, male volunteers)[18]. (d) a single-dose administration (day 1) and at steady state (10 days) of 200 mg (10 trials of 8 subjects, 18-45 years, male volunteers)[18]. (e) a single-dose administration (day 1) and at steady state (10 days) of 300 mg (10 trials of 8 subjects, 18-45 years, male volunteers)[18]. (f) a single-dose administration (day 1) and at steady state (10 days) of 400 mg (10 trials, 18-45 years, male volunteers)[18]. (g) a single oral dose of 100 mg on day 5 (10 trials of 29 subjects, 21-60, male volunteers)[28]. (h) a single oral dose of 100 mg (10 trials of 8 subjects, male volunteers, 18-32 years)[11]. (i) a single oral dose of 100 mg q.d. (10 trials of 16 subjects, 18-50 years, male volunteers)[19]. (j) a single oral dose of 100 mg (10 trials of 32 subjects, 18-55 years, 50% females)[20]. (k) a single oral dose of 100 mg once daily for 5 days (10 trials of 17 subjects, ≥19 years, male volunteers)[13]. (l) a single oral dose of 100 mg (10 trials of 12 subjects, 18-55 years, 58 % females)[14].**.a**(m) a single oral dose of 100 mg of sitagliptin (10 trials of 16 subjects, 18-45 years, 50% females)[12]. (n) a single oral dose of 100 mg of sitagliptin (10 trials of subjects, 18-45 years, 33% females)[10]. (o) a multiple oral dose of 200 mg of sitagliptin (10 trials of 24 subjects,45-65 years,58 % female)[16]. (p) a multiple oral dose of 200 mg of sitagliptin ( 10 trials of 24 subjects,45-65 years,58 % females)[16]. (q) a single oral dose of 100 mg of sitagliptin( 10 trials of 10 subjects,18-75 years,50 % females)[29]. (r) a single oral dose of 5 mg of sitagliptin(10 trials of 6 subjects, male volunteers,20-46 years)[17]. (s) a single oral dose of 12.5 mg of sitagliptin( 10 trials of 6 subjects, male volunteers,18-50 years)[17].(t) a single oral dose of 25 mg- fasted of Sitagliptin( 10 trials of 6 subjects, male volunteers,18-50 years)[17].(u) a single oral dose of 25 mg -fed of sitagliptin( 10 trials of 6 subjects, male volunteers,18-50 years)[17].(v) a single oral dose of 50 mg of sitagliptin( 10 trials of 6 subjects, male volunteers,18-50 years)[17]. (w) a single oral dose of 100 mg of sitagliptin( 10 trials of 6 subjects, male volunteers,18-50 years)[17]. (x) a single oral dose of 200 mg of sitagliptin( 10 trials of 6 subjects, male volunteers,18-50 years)[17]. (y) a single oral dose of 400 mg of sitagliptin( 10 trials of 6 subjects, male volunteers,18-50 years)[17]. Solid black lines represent the simulated average concentration, red dots represent the observed clinical data, and grey lines represent the 5th percentile and the 95th percentiles.


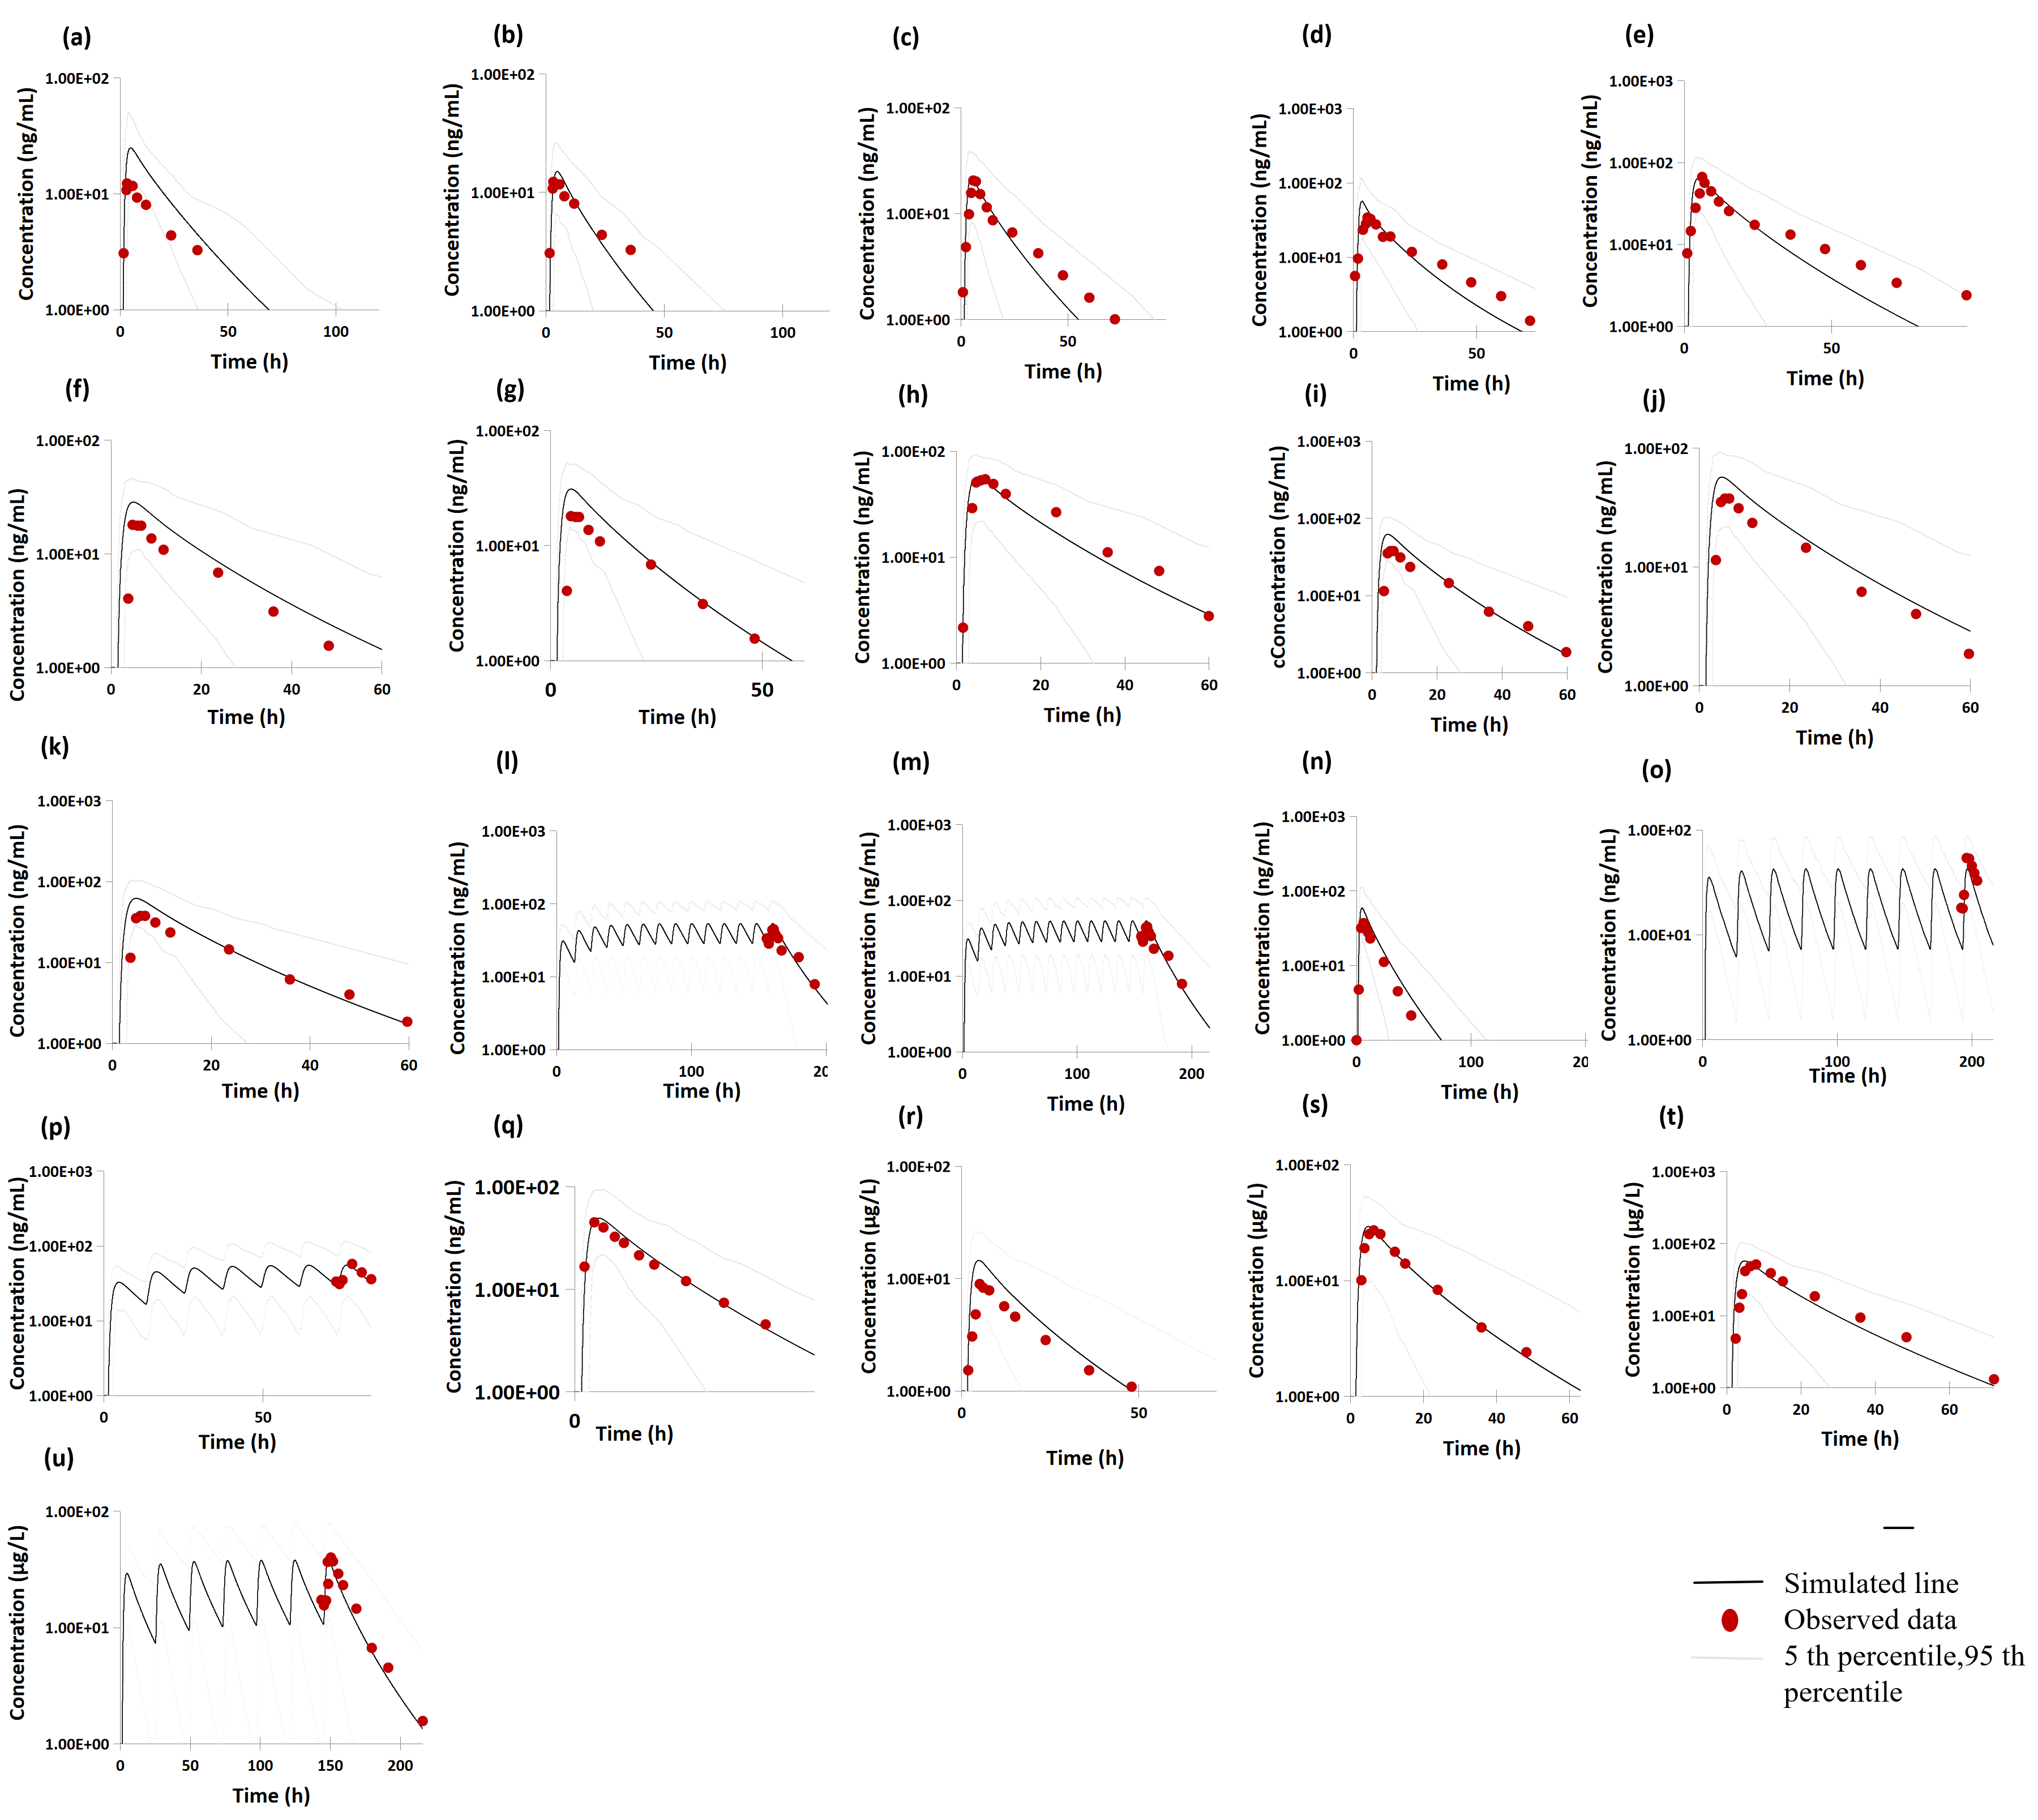


**Fig. S2** Mean plasma concentration of duloxetine after (a) single oral dose of 20 mgaof duloxetine r( 10 trials of subjects,18-64 years,16% females, child pugh (B))[22]. (b) a single oral dose of 20 mg of duloxetine r( 10 trials of subjects,18-64 years,14 % females)[22]. (c) a single oral dose of 22.4 mg of duloxetine r( 10 trials of 12 subjects,22-25 years,50 % females)[25]. (d) a single oral dose of 44.8 mg of duloxetine r( 10 trials of 12 subjects,22-25 years,50 % females)[23]. (e) a single oral dose of 67.2 mg of duloxetine r( 10 trials of 12 subjects,22-25 years,50 % females)[17]. (f) a single oral dose of 30 mg of duloxetine r( 10 trials of subjects,21-25 years,0 % females)[21]. (g) a single oral dose of 30 mg of duloxetine r( 10 trials of 10 subjects,21-25 years,100 % females)[21]. (h) a single oral dose of 90 mg of duloxetine r( 10 trials of 10 subjects,21-25 years,0 % females)[21]. (i) a single oral dose of 90 mg of duloxetine r( 10 trials of 10 subjects,21-25 years,100 % females)[21]. (j) a single oral dose of 60 mg of duloxetine r( 10 trials of 10 subjects,21-25 years,0 % females)[21]. (k) a single oral dose of 60 mg of duloxetine r( 10 trials of 10 subjects,21-25 years,100 % females)[21]. (l) a multiple oral dose of 30 mg of duloxetine ( 10 trials of 10 subjects,21-25 years,0 % females)[21]. (m) amultiple oral dose of 30 mg of duloxetine ( 10 trials of 10 subjects,21-25 years,100 % females)[21]. (n) a single oral dose of 60 mg of duloxetine ( 10 trials of 10 subjects,20-45 years,40.6% females)[21]. (o) a multiple oral dose of 60 mg of duloxetine r( 10 trials of 10 subjects,20-45years,40.6% females)[21]. (p) a single oral dose of 40 mg of duloxetine r( 10 trials of 6 subjects,22-35 years,100 % females)[26]. (q) a single oral dose of 40 mg of duloxetine r( 10 trials of 12 subjects,32-50 years,100 % females)[27]. (r) a single oral dose of 15 mg of duloxetine r( 10 trials of subjects,32-50 years,100 % females)[8]. (s) a single oral dose of 30 mg of duloxetine r( 10 trials of subjects,32-50 years,100 % females)[8] .(t) a single oral dose of 60 mg of duloxetine r( 10 trials of subjects,32-50 years,100 % females)[8]. (u) a multiple oral dose of 30 mg of duloxetine r( 10 trials of subjects,32-50 years,100 % females)[8]. Solid black lines represent the simulated average concentration, red dots represent the observed clinical data, and grey lines represent the 5th percentile and the 95th percentiles.


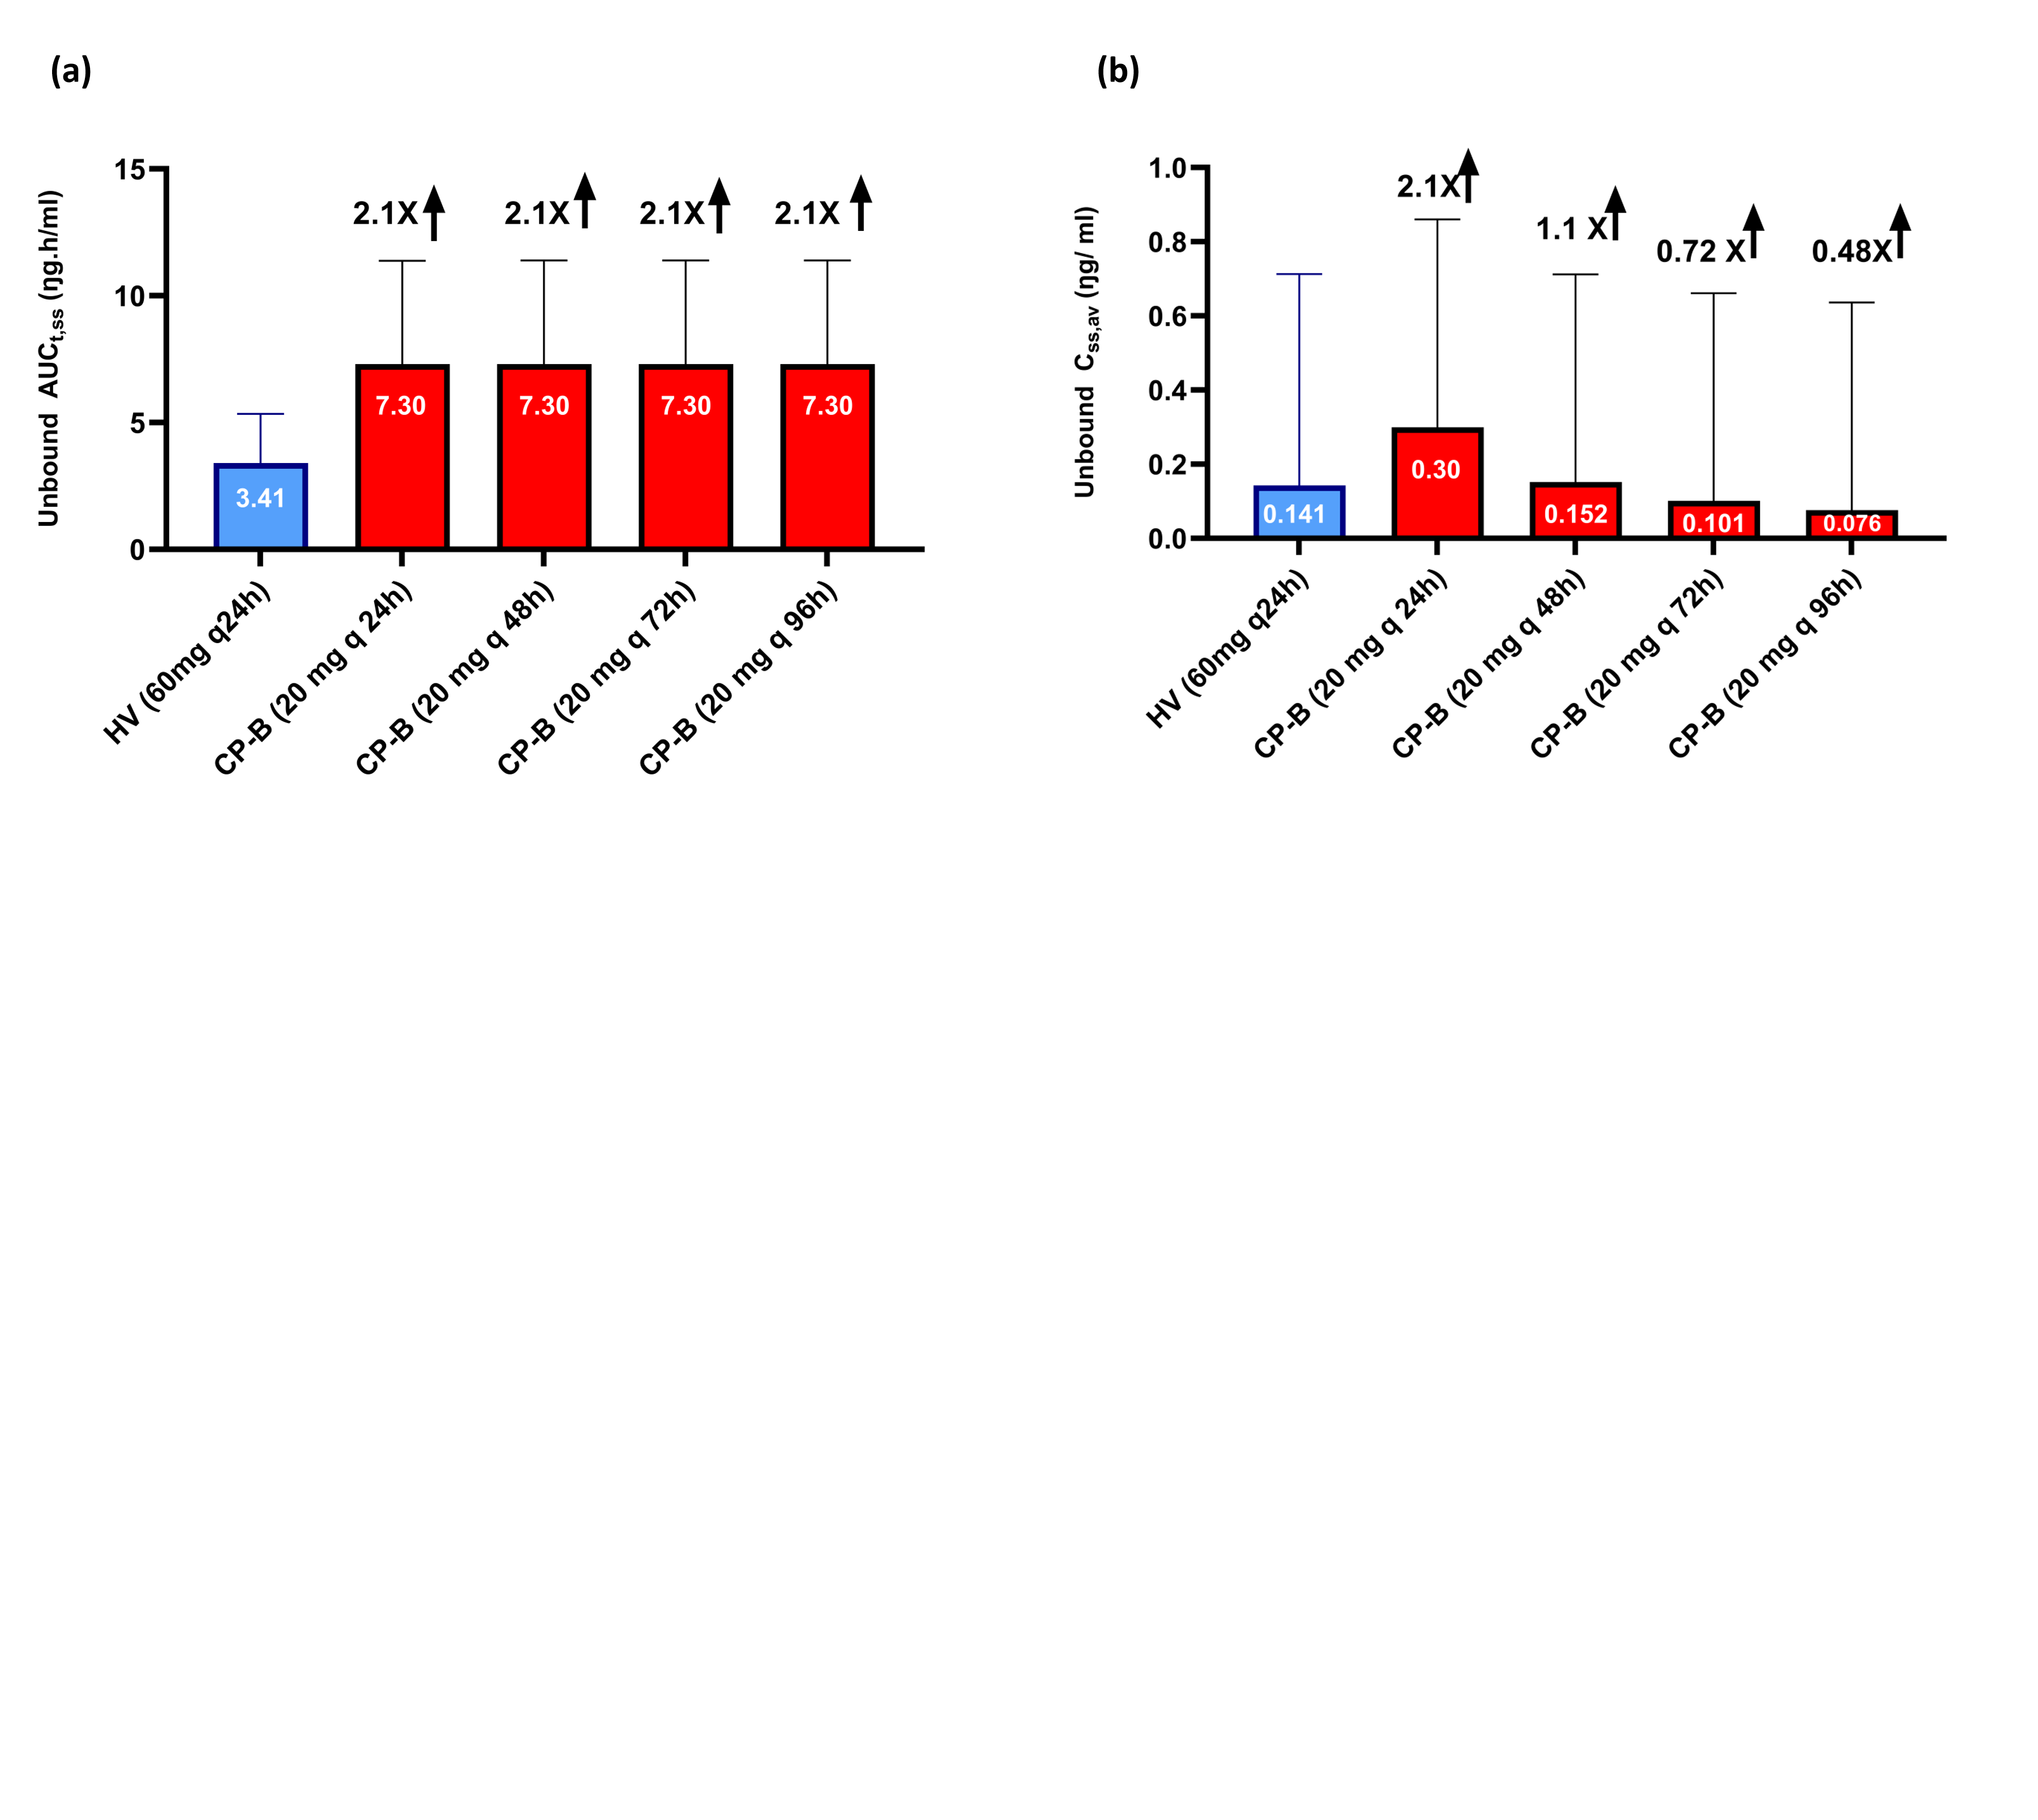


**Fig. S3** Simulated unbound duloxetine exposure in healthy volunteers (HV) and patients with Child–Pugh class B (CP-B). (a) Comparison of unbound AUC(0–24h) following 60 mg q24h in HV and 20 mg administered at different dosing intervals (q24h–q96h) in CP-B patients. The simulations for duloxetine were set to 10 subjects and 10 trials with age ranges of 18–65 years in HVs and 20–90 years in cirrhosis patients, as well as 50% females and simulation duration up to 15 days to reach steady state. AUC τ,ss; Area Under the Curve from start of the dose administration to the specified interval at steady state, CP-B; Child‒Pugh class B, (b) Unbound C av; unbound average concentration across the same dosing scenarios. Fold changes related to HV are indicated above each bar.

**Table S6** Patient demographics and baseline characteristics for duloxetineraphics and baseline characteristics for duloxetine

| Population | All Patients | Control group  60 mg | CP-A group  30 mg | Unpaired  P-valuea |
| --- | --- | --- | --- | --- |
| Number of patients | 22 | 11 | 11 |  |
| Weight (kg) | 76.6±6.3 | 76.8±6.2 | 76.4±6.6 | 0.870 |
| BMI (kg/m²) | 22.76±1.5 | 22.8±1.5 | 22.7±1.5 | 0.828 |
| Age (year) | 53.9±3.5 | 53.36±2.7 | 54.45±4.13 | 0.475 |
| Duration of diabetes (years) | 5.6±2.2 | 5.1±1.9 | 6.2±2.3 | 0.244 |
| Duration of DPNP (years) | 2±0.97 | 1.73±0.9 | 2.3±1 | 0.198 |
| Gender | | | | |
| Male (n%) | 13 | 7(63.6%) | 6(54.5%) | |
| Female (n%) | 9 | 4(36.4%) | 5(45.5%) | |
| BPI-Severity | | | | |
| Pain on average | 5.7±1.3 | 5.45±1.4 | 6±1.3 | 0.344 |
| Worst pain | 6.6±1.2 | 6.55±1.3 | 6.6±1.1 | 0.862 |
| Least pain | 4.2±1.03 | 3.91±1.1 | 4.41±0.9 | 0.270 |
| Pain right now | 5.3±1.3 | 5.09±1.4 | 5.5±1.1 | 0.519 |
| BPI interference | | | | |
| General activity | 3.9±0.82 | 3.86±0.9 | 3.9± 0.8 | 0.9 |
| Mood | 3.5±1.1 | 3.41±1.02 | 3.59± 1.2 | 0.7 |
| Walking ability | 3.3±0.9 | 3.09±0.8 | 3.59±0.9 | 0.189 |
| Normal work | 3.34±1.1 | 3.27±1.1 | 3.41±1.1 | 0.772 |
| Relations with other people | 2.75±0.95 | 2.96±0.96 | 2.55±0.9 | 0.324 |
| Sleep | 3.43±1.1 | 3.64±1.2 | 3.23±0.9 | 0.399 |
| Enjoyment of life | 2.93±1.3 | 2.64±1.5 | 3.23±0.9 | 0.294 |

BMI; Body mass index, DPNP; diabetic peripheral neuropathic pain, BPI; Brief Pain Inventory, n (%); number (percentage), NR; not relevant, a; unpaired t-test between control and CP-A group. Data presented as mean ± Standard deviation.

**Table S7** Clinical and biochemical characteristics before and after treatment with duloxetine.

| Lab Values | | All patients | Control  60 mg  (n=11) | CP-A  30 mg  (n=11) | Unpaired  P-Valuea |
| --- | --- | --- | --- | --- | --- |
| Albumin (g/dl) | Before Treatment | 3.84±0.43 | 4.08±0.51 | 3.60±0.1 | 0.013* |
| After Treatment | 4.05±0.53 | 3.41±0.34 | 0.004* |
| Δ (After-Before) | -0.033±0.16 | -0.194±0.39 | 0.235 |
| Paired p-values | 0.518 | 0.136 |  |
| T.Bilirubin (mg/dL) | Before Treatment | 1.17±0.15 | 1.09±0.10 | 1.24±0.17 | 0.034* |
| After Treatment | 1.08±0.12 | 1.26±0.19 | 0.026* |
| Δ (After-Before) | -0.01±0.11 | 0.02±0.13 | 0.533 |
| Paired p-values | 0.764 | 0.607 |  |
| INR | Before Treatment | 1.08±0.11 | 0.99±0.06 | 1.17±0.05 | <0.001* |
| After Treatment | 0.98±0.05 | 1.18±0.09 | <0.001* |
| Δ (After-Before) | -0.014±0.06 | 0.008±0.09 | 0.513 |
| Paired p-values | 0.456 | 0.772 |  |
| ALT (U/L) | Before Treatment | 38.6±3.3 | 39.55±3.33 | 37.64±3.11 | 0.180 |
| After Treatment | 40.55±7.81 | 41.45±6.62 | 0.772 |
| Δ (After-Before) | 1±7.69 | 3.82±6.19 | 0.356 |
| Paired p-values | 0.676 | 0.068 |  |
| AST (U/L) | Before Treatment | 41.4±4.2 | 42.91±2.77 | 39.91±4.89 | 0.097 |
| After Treatment | 44.36±6.58 | 45.91±9.47 | 0.662 |
| Δ (After-Before) | 1.45±7.63 | 6±10.5 | 0.262 |
| Paired p-values | 0.542 | 0.088 |  |
| HbA1C% | Before Treatment | 7.35±0.38 | 7.47±0.48 | 7.23±0.19 | 0.137 |
| After Treatment | 7.55±0.37 | 7.28±0.34 | 0.098 |
| Δ (After-Before) | 0.073±0.49 | 0.055±0.41 | 0.926 |
| Paired p-values | 0.637 | 0.667 |  |
| 2hr-PPG (mg/dL) | Before Treatment | 227.9±9.3 | 230.09±9.39 | 225.73±9.12 | 0.283 |
| After Treatment | 232.36±9.23 | 228.1±11.5 | 0.348 |
| Δ (After-Before) | 2.3±12.7 | 2.4±6.5 | 0.983 |
| Paired p-values | 0.567 | 0.253 |  |
| FBG (mg/dL) | Before Treatment | 158.2±9.9 | 160.82±8.01 | 155.6±11.4 | 0.235 |
| After Treatment | 162.9±10.7 | 156.5±12.4 | 0.213 |
| Δ (After-Before) | 2.09±8.92 | 0.9±10.6 | 0.781 |
| Paired p-values | 0.455 | 0.783 |  |
| WBCs (mg/dL) | Before Treatment | 4.83±0.36 | 4.89±0.43 | 4.77±0.28 | 0.454 |
| After Treatment | 4.82±0.53 | 4.62±0.49 | 0.370 |
| Δ (After-Before) | -0.073±0.39 | -0.155±0.45 | 0.653 |
| Paired p-values | 0.553 | 0.277 |  |
| PLT (mg/dL) | Before Treatment | 145.86±8.33 | 147.91±6.56 | 143.82±9.67 | 0.262 |
| After Treatment | 146.1±11.4 | 141.36±8.72 | 0.288 |
| Δ (After-Before) | -1.82±6.40 | -2.45±5.24 | 0.801 |
| Paired p-values | 0.368 | 0.151 |  |
| Hg (mg/dL) | Before Treatment | 13.13±0.53 | 13.08±0.69 | 13.09±0.49 | 0.972 |
| After Treatment | 12.94±0.62 | 12.87±0.68 | 0.821 |
| Δ (After-Before) | -0.145±0.73 | -0.218±0.64 | 0.807 |
| Paired p-values | 0.525 | 0.283 |  |
| BUN (mg/dL) | Before Treatment | 22.5±1.6 | 22.64±1.50 | 22.36±1.69 | 0.693 |
| After Treatment | 22.27±1.95 | 22.18±1.83 | 0.912 |
| Δ (After-Before) | -0.36±2.66 | -0.18±2.82 | 0.878 |
| Paired p-values | 0.659 | 0.835 |  |
| Scr (mg/dL) | Before Treatment | 1.12±0.20 | 1.15±0.18 | 1.09±0.23 | 0.547 |
| After Treatment | 1.17±0.20 | 1.13±0.22 | 0.705 |
| Δ (After-Before) | 0.02±0.12 | 0.04±0.13 | 0.736 |
| Paired p-values | 0.618 | 0.353 |  |

T. Bilirubin; total bilirubin, INR; international normalized ratio, ALT; Alanine aminotransferase, AST; Aspartate aminotransferase, Hb A1C; hemoglobin A1C, 2hr- PPG; post prandial glucose, FBG; fasting blood glucose, WBC; white blood cell, PLT; platelet, Hb; hemoglobin, BUN; blood urea nitrogen, Scr; serum creatine. Data presented as mean ± Standard deviation. NR; not relevant. a; unpaired t-test between control and CP-A group. *P-value<0.05.

**Table S8 C**hanges from baseline to week 12.

| Item | Control group (60 mg)  mean (SD) (n=11) | (CP-A) group (30 mg)  mean (SD) (n=11) | Difference from control (95% CI) | P-Value |
| --- | --- | --- | --- | --- |
| BPI-Severity: | | | | |
| Average pain | 2.73(0.96) | 2.64(0.24) | -0.09 (-0.88 to 0.7) | 0.812 |
| Worst pain | 3.36(0.84) | 3.05(0.72) | -0.32 (-1.01 to 0.38) | 0.352 |
| Least pain | 2.36(0.81) | 2.32(0.96) | -0.05 (-0.83 to 0.74) | 0.905 |
| Pain right now | 2.68(0.84) | 2.59(0.77) | -0.09 (-0.81 to 0.63) | 0.794 |
| BPI interference | | | | |
| Average of 7 interference scores | 1.94(0.3) | 2.04(0.4) | 0.1 (-0.2 to 0.4) | 0.503 |
| General activity | 2.59(1.1) | 2.5(0.92) | -0.09 (-1 to 0.82) | 0.837 |
| Walking ability | 1.77(0.72) | 2.14(0.92) | 0.36 (-0.37 to 1.1) | 0.316 |
| Mood | 2.09(0.77) | 2.05(0.76) | -0.05 (-0.72 to 0.63) | 0.890 |
| Normal work | 1.86(0.71) | 1.91(0.8) | 0.05 (-0.63 to 0.72) | 0.889 |
| Relations with other people | 1.27(1.10) | 1.91(0.80) | 0.64 (-0.22 to 1.49) | 0.137 |
| Sleep | 2.41(0.83) | 1.86(0.67) | -0.55 (-1.22 to 0.13) | 0.106 |
| Enjoyment of life | 1.59(1.18) | 1.91(0.66) | 0.32 (-0.53 to 1.17) | 0.445 |

BPI: Brief Pain Inventory.

**Table S9** Patient demographics and baseline characteristics for sitagliptin.

| Sitagliptin | All patients | Control  Dose=100 mg | CP-A  Dose=100 mg | Unpaired  P-valuea | CP-B  Dose= 50 mg | Unpaired  P-value b | CP-C  Dose= 50 mg | Unpaired  P-value c |
| --- | --- | --- | --- | --- | --- | --- | --- | --- |
| Number of patients | 42 | 12 | 12 | | 12 | | 6 | |
| Weight (kg) | 75.4±6.7 | 75.8±6.3 | 75.3±7.2 | 0.857 | 75.5±8.2 | 0.912 | 74.2±3.9 | 0.504 |
| BMI (kg/m2) | 22.2±2 | 22.7±2.3 | 22.2±2.1 | 0.588 | 22.17±2 | 0.537 | 21.5±0.96 | 0.127 |
| Age (year) | 52.95±4.8 | 50.9±5.2 | 52.75±5.9 | 0.431 | 54.33±3.5 | 0.08 | 54.67±3.01 | 0.073 |
| Gender | | | | | | | | |
| Male (n%) | 21 | 9(75%) | 7 (58.3%) | | 8(66.7%) | | 4(66.7%) | |
| Female (n%) | 11 | 3(25%) | 5(41.6%) | | 4(33.3%) | | 2(33.3%) | |

BMI; Body mass index, Data presented as mean ± Standard deviation, n (%); number(percentage), a; unpaired t-test between control and CP-A group, b; unpaired t-test between control and CP-B group, c; unpaired t-test between control and CP-C group.

**Table S10** Clinical and biochemical characteristics before and after treatment with sitagliptin.

|  | |  |  | Child Pugh Score Classifications | | | | |
| --- | --- | --- | --- | --- | --- | --- | --- | --- |
|  |  |  | | | | |
| **All patients**  **Baeseline** | **Control**  **100 mg**  **(n=12)** | **CP-A**  **100 mg**  **(n=12)** | **Un Paired P-Value a** | **CP-B**  **50 mg**  **(n=12)** | **Un Paired P-Value b** | **CP-C**  **50 mg**  **(n=6)** | **Un Paired P-Value** c |
| Albumin (g/dl) | Before Treatment | 3.5±0.59 | 4.05±0.49 | 3.68±0.29 | 0.036* | 3.159±0.25 | <0.001* | 2.59±0.11 | <0.001* |
| After Treatment | 4.02±0.52 | 3.59±0.38 | 0.033* | 3.155±0.23 | <0.001* | 2.55±0.14 | <0.001* |
| Δ (After-Before) | -0.038±0.16 | -0.088±0.22 | 0.523 | -0.004±0.36 | 0.766 | -0.043±0.16 | 0.952 |
| Paired p-values | 0.411 | 0.185 |  | 0.969 |  | 0.543 |  |
| T.Bilirubin (mg/dL) | Before Treatment | 2.13±1.5 | 1.06±0.13 | 1.25±0.17 | 0.005* | 2.45±0.23 | <0.001* | 5.42±0.26 | <0.001* |
| After Treatment | 1.05±0.14 | 1.26±0.18 | 0.005* | 2.46±0.26 | <0.001* | 5.45±0.26 | <0.001* |
| Δ (After-Before) | -0.004±0.13 | -0.01±0.12 | 0.787 | 0.004±0.26 | 0.921 | 0.033±0.27 | 0.755 |
| Paired p-values | 0.913 | 0.785 |  | 0.956 |  | 0.771 |  |
| INR | Before Treatment | 1.4±0.4 | 1±0.07 | 1.21±0.20 | 0.005* | 1.74±0.17 | <0.001* | 1.98±0.35 | 0.001* |
| After Treatment | 0.99±0.06 | 1.31±0.18 | <0.001* | 1.75±0.17 | <0.001* | 2±0.42 | 0.002* |
| Δ (After-Before) | -0.01±0.07 | 0.1±0.29 | 0.238 | 0.01±0.09 | 0.744 | 0.02±0.12 | 0.625 |
| Paired p-values | 0.631 | 0.270 |  | 0.955 |  | 0.741 |  |
| ALT (U/L) | Before Treatment | 36±6.4 | 41.25±3.74 | 39.67±5.57 | 0.424 | 35.25±4.59 | 0.002* | 28.17±3.76 | <0.001* |
| After Treatment | 39.92±3.70 | 38.17±2.66 | 0.199 | 33.75±5.83 | 0.006* | 26.5±4.32 | <0.001* |
| Δ (After-Before) | -1.33±4.96 | -1.50±4.98 | 0.935 | -1.50±5.18 | 0.937 | -1.67±6.62 | 0.916 |
| Paired p-values | 0.372 | 0.319 |  | 0.337 |  | 0.565 |  |
| AST (U/L) | Before Treatment | 37±5.1 | 42.17±2.76 | 39.83±3.54 | 0.087 | 36.33±4.87 | 0.002* | 31.33±3.67 | <0.001* |
| After Treatment | 41.92±4.25 | 42.92±5.90 | 0.639 | 37.08±6.30 | 0.04* | 32.67±4.63 | 0.003* |
| Δ (After-Before) | -0.25±4.25 | 3.08±6.07 | 0.135 | 0.75±3.62 | 0.541 | 1.33±3.14 | 0.388 |
| Paired p-values | 0.842 | 0.106 |  | 0.488 |  | 0.346 |  |
| HbA1C% | Before Treatment | 8.5±0.5 | 8.84±0.32 | 8.42±0.41 | 0.493 | 8.23±0.58 | 0.005* | 7.98±0.29 | <0.001* |
| After Treatment | 7.5±0.63 | 7.58±0.61 | 0.769 | 7.31±0.53 | 0.427 | 6.97±0.39 | 0.04* |
| Δ (After-Before) | -1.34±0.68 | -0.84±0.36 | 0.257 | -0.92±0.39 | 0.08 | -1.02±0.28 | 0.171 |
| Paired p-values | <0.001* | <0.001* |  | <0.001* |  | <0.001* |  |
| 2hr-PPG (mg/dL) | Before Treatment | 239.6±24.1 | 252.5±16.45 | 249.5±19.4 | 0.687 | 238.1±14.2 | 0.03* | 196.83±7.94 | <0.001* |
| After Treatment | 207.42±17.60 | 208.3±19.3 | 0.904 | 202.92±6.33 | 0.420 | 162.7±14.7 | <0.001* |
| Δ (After-Before) | -45.1±15.4 | -41.2±17.5 | 0.567 | -35.2±13.5 | 0.108 | -34.17±8.89 | 0.076 |
| Paired p-values | <0.001* | <0.001* |  | <0.001* |  | <0.001* |  |
| FBG (mg/dL) | Before Treatment | 153.9±9.8 | 156.67±9.80 | 155.4±10.7 | 0.769 | 153±10.1 | <0.001* | 147.17±4.12 | 0.011* |
| After Treatment | 122.5±7.88 | 123.67±9.80 | 0.751 | 117.92±6.37 | <0.001* | 110.67±8.29 | 0.018* |
| Δ (After-Before) | -34.17±6.21 | -31.75±7.16 | 0.387 | -35.08±8.02 | 0.063 | -36.5±10.8 | 0.642 |
| Paired p-values | <0.001* | <0.001* |  | <0.001* |  | <0.001* |  |
| LDL (mg/dL) | Before Treatment | 98.7±2.9 | 99.58±3.37 | 98.92±3.1 | 0.616 | 98.42±2.4 | 0.342 | 97±2 | 0.06 |
| After Treatment | 98.92±3.06 | 98.17±3.2 | 0.566 | 97.85±3.18 | 0.307 | 96.7±3.1 | 0.182 |
| Δ (After-Before) | -0.67±2.46 | -0.75±2.5 | 0.935 | -0.83±2.8 | 0.879 | -0.33±2.3 | 0.785 |
| Paired p-values | 0.368 | 0.319 |  | 0.328 |  | 0.741 |  |
| TGs (mg/dL) | Before Treatment | 148.7±4.7 | 149.5±5.27 | 148.75±4.4 | 0.708 | 148.4±4.5 | 0.593 | 147.5±5.2 | 0.464 |
| After Treatment | 146.33±6.77 | 146.08±6.04 | 0.925 | 145.5±6.30 | 0.758 | 145.3±3.8 | 0.694 |
| Δ (After-Before) | -3.17±5.17 | -1.08±3.82 | 0.821 | -0.33±4.56 | 0.907 | -0.17±1.72 | 0.719 |
| Paired p-values | 0.06 | 0.121 |  | 0.08 |  | 0.378 |  |
| HDL (mg/dL) | Before Treatment | 43.7±5.3 | 45.25±6.68 | 44±4.8 | 0.605 | 43.5±4.4 | 0.458 | 40.5±4.04 | 0.08 |
| After Treatment | 45.50±7.08 | 44.4±5.2 | 0.673 | 43.8±5.1 | 0.517 | 41.2±4.5 | 0.138 |
| Δ (After-Before) | 0.25±4.47 | 0.42±4.8 | 0.931 | 0.33±4.9 | 0.966 | 0.67±4.1 | 0.847 |
| Paired p-values | 0.850 | 0.770 |  | 0.817 |  | 0.706 |  |
| T.CH (mg/dL) | Before Treatment | 200.2±6.04 | 201±6.92 | 200.5±6.8 | 0.860 | 199.75±6.1 | 0.644 | 198.7±2.1 | 0.30 |
| After Treatment | 199.92±4.6 | 198.8±5.7 | 0.614 | 198.3±5.5 | 0.451 | 195.5±4.2 | 0.07 |
| Δ (After-Before) | -1.08±3.32 | -1.67±4.1 | 0.703 | -1.42±3.9 | 0.822 | -3.17±4.9 | 0.380 |
| Paired p-values | 0.282 | 0.182 |  | 0.229 |  | 0.175 |  |
| WBCs(mg/dL) | PLL, KIJDBefore Treatment | 5.15±0.37 | 5.11±0.44 | 5.21±0.3 | 0.526 | 5.14±0.34 | 0.838 | 5.15±0.46 | 0.859 |
| After Treatment | 5.03±0.37 | 5.13±0.27 | 0.5 | 5.08±0.37 | 0.786 | 5.08±0.52 | 0.840 |
| Δ (After-Before) | -0.075±0.32 | -0.083±0.18 | 0.938 | -0.07±0.34 | 0.952 | -0.067±0.3 | 0.958 |
| Paired p-values | 0.437 | 0.127 |  | 0.517 |  | 0.611 |  |
| PLT (mg/dL) | Before Treatment | 143.3±12.1 | 152.67±3.37 | 150.08±3.32 | 0.072 | 138.08±4.29 | <0.001* | 121.2±12.1 | 0.002* |
| After Treatment | 152.58±2.75 | 149.67±4.05 | 0.053 | 137.5±3.99 | <0.001* | 120.2±11.4 | 0.001* |
| Δ (After-Before) | -0.08±2.47 | -0.42±5 | 0.839 | -0.58±2.61 | 0.635 | -1±1.90 | 0.401 |
| Paired p-values | 0.91 | 0.778 |  | 0.455 |  | 0.253 |  |
| Hg (mg/dL) | Before Treatment | 12.5±0.97 | 13.15±0.59 | 13.01±0.33 | 0.475 | 12.17±0.86 | 0.004* | 11±0.71 | <0.001* |
| After Treatment | 13.03±0.63 | 12.96±0.39 | 0.761 | 12.26±0.57 | 0.005* | 11.08±0.38 | <0.001* |
| Δ (After-Before) | -0.13±0.57 | -0.05±0.35 | 0.701 | 0.09±0.72 | 0.423 | 0.083±0.67 | 0.530 |
| Paired p-values | 0.463 | 0.628 |  | 0.668 |  | 0.771 |  |
| BUN (mg/dL) | Before Treatment | 20.11±2.1 | 20.75±2.3 | 20.33±2.1 | 0.648 | 19.58±1.44 | 0.154 | 19.5±2.7 | 0.365 |
| After Treatment | 20.85±3.15 | 20.08±2.6 | 0.678 | 19.75±2.4 | 0.473 | 20.3±3.5 | 0.886 |
| Δ (After-Before) | 0.17±3.69 | -0.25±3.65 | 0.956 | 0.17±2.3 | 0.793 | 0.83±1.36 | 0.615 |
| Paired p-values | 0.878 | 0.817 |  | 0.806 |  | 0.625 |  |
| Scr (mg/dL) | Before Treatment | 1.1±0.2 | 1.16±0.19 | 1.08±0.22 | 0.391 | 1.02±0.14 | 0.06 | 1.04±0.18 | 0.226 |
| After Treatment | 1.114±0.21 | 1.113±0.24 | 0.993 | 1.04±0.2 | 0.393 | 1.07±0.11 | 0.596 |
| Δ (After-Before) | -0.044±0.23 | 0.03±0.22 | 0.433 | 0.024±0.15 | 0.403 | 0.033±0.13 | 0.377 |
| Paired p-values | 0.527 | 0.645 |  | 0.580 |  | 0.547 |  |

T. Bilirubin; total bilirubin, INR; international normalized ratio, ALT; Alanine aminotransferase, AST; Aspartate aminotransferase, A1C; hemoglobin A1C, 2hr- PPG; post prandial glucose; FBG: fasting blood glucose, LDL; Low density lipoprotein, TG; triglyceride, HDL; High density lipoprotein, TC; total cholesterol, WBC; white blood cell ,PLT; platelet, Hb; hemoglobin, BUN; blood urea nitrogen, Scr; serum creatinine. Data presented as mean ± Standard deviation. a; unpaired t-test between control and CP-A group, b; unpaired t-test between control and CP-B group, c; unpaired t-test between control and CP-C group. *P-value<0.05.

**Reference**

1. Jamei M, Turner D, Yang J, Neuhoff S, Polak S, Rostami-Hodjegan A, Tucker G (2009) *Population-based mechanistic prediction of oral drug absorption.* The AAPS journal **11**(2): 225-237. https:// doi: 10.1208/s12248-009-9099-y.

2. Bergman A, Ebel D, Liu F, Stone J, Wang A, Zeng W, Chen L, Dilzer S, Lasseter K, Herman G, Wagner J, Krishna R (2007) *Absolute bioavailability of sitagliptin, an oral dipeptidyl peptidase‐4 inhibitor, in healthy volunteers.* Biopharmaceutics & drug disposition **28**(6): 315-322. https:// doi: 10.1002/bdd.560.

3. Lau YY, Chen YH, Liu TT, Li C, Cui X, White RE, Cheng KC (2004) *Evaluation of a novel in vitro Caco-2 hepatocyte hybrid system for predicting in vivo oral bioavailability.* Drug metabolism and disposition **32**(9): 937-942. https:// PMID: 15319334.

4. Rodgers T, Rowland M (2007) *Mechanistic approaches to volume of distribution predictions: understanding the processes.* Pharmaceutical research **24**(5): 918-933.https:/// doi: 10.1007/s11095-006-9210-3.

5. Richter B, Bandeira-Echtler E, Bergerhoff K, Lerch C (2008) *Emerging role of dipeptidyl peptidase-4 inhibitors in the management of type 2 diabetes.* Vascular health and risk management **4**(4): 753-768. https:// doi: 10.2147/vhrm.s1707.

6. Berezhkovskiy LM (2006) *Determination of drug binding to plasma proteins using competitive equilibrium binding to dextran-coated charcoal.* Journal of pharmacokinetics and pharmacodynamics **33**(5): 595-608. https:// doi: 10.1007/s10928-006-9024-2.

7. Knadler MP, Lobo E, Chappell J, Bergstrom R (2011) *Duloxetine: clinical pharmacokinetics and drug interactions.* Clinical pharmacokinetics **50**(5): 281-294. https:// doi: 10.2165/11539240-000000000-00000.

8. Li H, Li T, Li Y, Shen Y (2013) *Pharmacokinetics and safety of duloxetine enteric-coated tablets in chinese healthy volunteers: a randomized, open-label, single-and multiple-dose study.* Clinical Psychopharmacology and Neuroscience **11**(1): 28. https:// doi: 10.9758/cpn.2013.11.1.28.

9. Sharma A, Goldberg MJ, Cerimele BJ (2000) *Pharmacokinetics and safety of duloxetine, a dual‐serotonin and norepinephrine reuptake inhibitor.* The Journal of Clinical Pharmacology **40**(2): 161-167. https:// doi: 10.1177/00912700022008810.

10. Kasichayanula S, Liu X, Shyu WC, Zhang W, Pfister M, Griffen SC, Li T, LaCreta FP, Boulton DW (2011) *Lack of pharmacokinetic interaction between dapagliflozin, a novel sodium–glucose transporter 2 inhibitor, and metformin, pioglitazone, glimepiride or sitagliptin in healthy subjects.* Diabetes, Obesity and Metabolism **13**(1): 47-54. https:// doi: 10.1111/j.1463-1326.2010.01314. x.

11. Krishna R, Bergman A, Larson P, Cote J, Lasseter K, Dilzer S, Wang A, Zeng W, Chen L, Wagner J, Herman G (2007) *Effect of a single cyclosporine dose on the single‐dose pharmacokinetics of sitagliptin (MK‐0431), a dipeptidyl peptidase‐4 inhibitor, in healthy male subjects.* The Journal of clinical pharmacology **47**(2): 165-174. https:// doi: 10.1177/0091270006296523.

12. He L, Wickremasingha P, Lee J, Tao B, Mendell-Harary J, Walker J, Wight D (2014) *Lack of effect of colesevelam HCl on the single-dose pharmacokinetics of aspirin, atenolol, enalapril, phenytoin, rosiglitazone, and sitagliptin.* Diabetes research and clinical practice **104**(3): 401-409. https:// doi: 10.1016/j.diabres.2013.12.033.

13. Moon SJ, Yu KS, Kim MG (2020) *An assessment of pharmacokinetic interaction between lobeglitazone and sitagliptin after multiple oral administrations in healthy men.* Clinical therapeutics **42**(6): 1047-1057. https:// doi: 10.1016/j.clinthera.2020.04.005.

14. Dawra VK, Cutler DL, Zhou S, Krishna R, Shi H, Liang Y, Alvey C, Hickman A, Saur D, Terra SG, Sahasrabudhe V *(2019) Assessment of the drug interaction potential of ertugliflozin with sitagliptin, metformin, glimepiride, or simvastatin in healthy subjects.* Clinical pharmacology in drug development **8**(3): 314-325. https:// doi: 10.1002/cpdd.472.

15. Scheen AJ (2012) *Pharmacokinetic evaluation of atorvastatin and sitagliptin in combination for the treatment of type 2 diabetes.* Expert Opinion on Drug Metabolism & Toxicology **8**(6): 745-758. https:// doi: 10.1517/17425255.2012.686603.

16. Herman GA, Bergman A, Liu F, Stevens C, Wang AQ, Zeng W, Chen L, Snyder K, Hilliard D, Tanen M, Tanaka W, Meehan AG, Lasseter K, Dilzer S, Blum R, Wagner JA (2006) *Pharmacokinetics and pharmacodynamic effects of the oral DPP‐4 inhibitor sitagliptin in middle‐aged obese subjects.* The Journal of Clinical Pharmacology **46**(8): 876-886. https:// doi: 10.1177/0091270006289850.

17. Herman GA, Mistry GC, Yi B, Bergman AJ, Wang AQ, Zeng W, Chen L, Snyder K, Ruckle JL, Larson PJ, Davies MJ, Langdon RB, Gottesdiener KM, Wagner JA (2011) *Evaluation of pharmacokinetic parameters and dipeptidyl peptidase‐4 inhibition following single doses of sitagliptin in healthy, young Japanese males.* British journal of clinical pharmacology **71**(3): 429-436. https:// doi: 10.1111/j.1365-2125.2010.03852. x.

18. Bergman AJ, Stevens C, Zhou Y, Yi B, Laethem M, De Smet M, Snyder K, Hilliard D, Tanaka W, Zeng W, Tanen M, Wang AQ, Chen L, Winchell G, Davies MJ, Ramael S, Wagner JA, Herman GA (2006) *Pharmacokinetic and pharmacodynamic properties of multiple oral doses of sitagliptin, a dipeptidyl peptidase-IV inhibitor: a double-blind, randomized, placebo-controlled study in healthy male volunteers.* Clinical Therapeutics **28**(1): 55-72. https:// doi: 10.1016/j.clinthera.2006.01.015.

19. Brand T, Macha S, Mattheus M, Pinnetti S, Woerle HJ (2012) *Pharmacokinetics of empagliflozin, a sodium glucose cotransporter-2 (SGLT-2) inhibitor, coadministered with sitagliptin in healthy volunteers.* Advances in therapy **29**(10): 889-899. https:// doi: 10.1007/s12325-012-0055-3.

20. Smulders RA, Zhang W, Veltkamp SA, van Dijk J, Krauwinkel WJ, Keirns J, Kadokura T (2012) *No pharmacokinetic interaction between ipragliflozin and sitagliptin, pioglitazone, or glimepiride in healthy subjects.* Diabetes, Obesity and Metabolism **14**(10): 937-943. https:// doi: 10.1111/j.1463-1326.2012.01624. x.

21. Zhao RK, Cheng G, Tang J, Song J, Peng WX (2009) *Pharmacokinetics of duloxetine hydrochloride enteric-coated tablets in healthy Chinese volunteers: a randomized, open-label, single-and multiple-dose study.* Clinical therapeutics **31**(5): 1022-1036. https:// doi: 10.1016/j.clinthera.2009.05.005.

22. Suri A, Reddy S, Gonzales C, Knadler MP, Branch RA, Skinner MH (2005) *Duloxetine pharmacokinetics in cirrhotics compared with healthy subjects.* International Journal of Clinical Pharmacology & Therapeutics **43**(2) :78-84. https:// doi: 10.5414/cpp43078.

23. Tianmei S, Knadler MP, Lim MT, Yeo KP, Teng L, Liang S, Pan AX, Lobo ED (2007) *Pharmacokinetics and tolerability of duloxetine following oral administration to healthy Chinese subjects.* Clinical pharmacokinetics **46**(9): 767-775. https:// doi: 10.2165/00003088-200746090-00004.

24. Chan C, Yeo KP, Pan AX, Lim M, Knadler MP, Small DS *(2007) Duloxetine pharmacokinetics are similar in Japanese and Caucasian subjects.* British journal of clinical pharmacology **63**(3): 310-314. https:// doi: 10.1111/j.1365-2125.2006.02770. x.

25. Ma N, Zhang BK, Li HD, Chen BM, Xu P, Wang F, Zhu RH, Feng S, Xiang DX, Zhu YG *(2007) Determination of duloxetine in human plasma via LC/MS and subsequent application to a pharmacokinetic study in healthy Chinese volunteers.* Clinica chimica acta **380**(1-2): 100-105. https:// doi: 10.1016/j.cca.2007.01.018.

26. Skinner MH, Kuan HY, Skerjanec A, Seger ME, Heathman M, O'Brien L, Reddy S, Knadler MP (2004) *Effect of age on the pharmacokinetics of duloxetine in women.* British journal of clinical pharmacology **57**(1): 54-61. https:// doi: 10.1046/j.1365-2125.2003.01963. x.

27. Lobo ED, Loghin C, Knadler MP, Quinlan T, Zhang L, Chappell J, Lucas R, Bergstrom RF (2008) *Pharmacokinetics of duloxetine in breast milk and plasma of healthy postpartum women.* Clinical pharmacokinetics **47**(2): 103-109. https:// doi: 10.2165/00003088-200847020-00003.

28. Aquilante CL, Wempe MF, Sidhom MS, Kosmiski LA, Predhomme JA (2013) *Effect of ABCB1 polymorphisms and atorvastatin on sitagliptin pharmacokinetics in healthy volunteers.* European journal of clinical pharmacology **69**(7): 1401-1409. https:// doi: 10.1007/s00228-013-1475-y.

29. Migoya EM, Stevens CH, Bergman AJ, Luo WL, Lasseter KC, Dilzer SC, Davies MJ, Wagner JA, Herman GA (2009) *Effect of moderate hepatic insufficiency on the pharmacokinetics of sitagliptin.* Can J Clin Pharmacol **16**(1): e165-e170. https:// PMID: 19221403.
